# Supplementary material for: Epidemiological characteristics, routine laboratory diagnosis, clinical signs and risk factors for hand, -foot -and -mouth disease: A systematic review and meta-analysis
Source: PubMed Central journal article supplement (PMC9049560; doi:10.1371/journal.pone.0267716), 2022-04-28
Supplement: pone.0267716.s007.pdf [file pone.0267716.s007.pdf]

# STATEMENT OF DELIVERY

Invoice# SV2MTYFRB

Balance Due  
**CNY0.00**

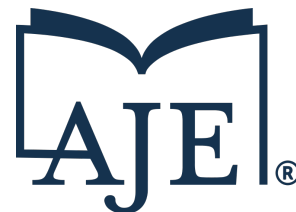

601 W Main St, Ste 102  
Durham, North Carolina, 27701, USA  
Tax ID: 412141424

|                 |                                                                                                                     |                                                                   |
|-----------------|---------------------------------------------------------------------------------------------------------------------|-------------------------------------------------------------------|
| Delivery Date : | 16 Aug 2021                                                                                                         | Bill To                                                           |
| Submission :    | V2MTYFRB                                                                                                            | 志杰 易                                                              |
| Word Count :    | 2404                                                                                                                | 15837189100                                                       |
| Title :         | Epidemiology, routine<br>laboratory diagnosis,<br>clinical signs and risk<br>factors with Hand-foot-<br>and-mout... | 李懿<br>河南省郑州市郑东新区农业南路105号<br>河南省疾病预防控制中心<br>郑州市<br>450016<br>China |

| # | Item & Description                   | Base Price         | Amount             |
|---|--------------------------------------|--------------------|--------------------|
| 1 | Standard Editing<br>Standard Editing | 1,604.75           | 1,604.75           |
|   |                                      | Sub Total          | 1,604.75           |
|   |                                      | <b>Total</b>       | <b>CNY1,604.75</b> |
|   |                                      | Payment Made       | (-) 1,604.75       |
|   |                                      | <b>Balance Due</b> | <b>CNY0.00</b>     |

请注意：本电子收据创建时间显示的是美国东部时间，该时间比您的当地时间可能晚12个（春夏）或13个小时（秋冬）。
